# Evaluation of the domain-state corrected multiple-specimen absolute palaeointensity protocol: a test of historical lavas from Iceland

Adrian R. Muxworthy and Samuel N. Taylor

Department of Earth Science and Engineering, Imperial College London, London, UK. E-mail: [adrian.muxworthy@imperial.ac.uk](mailto:adrian.muxworthy@imperial.ac.uk)

Accepted 2011 July 18. Received 2011 July 15; in original form 2011 January 17

## SUMMARY

Palaeointensity estimates were made for a suite of five historical lava flows from Mt Askja, Iceland, with the purpose of testing the newly proposed domain-state corrections to the multispecimen parallel differential pTRM palaeointensity method (MSP), where pTRM stands for partial thermoremanent magnetization. Before beginning the experimental procedure, the chemical stability on heating to the determined pTRM induction temperature was assessed; some flows were found to be unaltered by heating, some displayed inconsistent repeatability, while one flow was severely affected by heating. To implement the domain-state corrections and interpret the data successfully, we had to implement two new approaches to the MSP method: (1) we used vector addition/subtraction in our calculations, and (2) we introduced a new selection/rejection criterion that improves the robustness of the estimates by preferentially removing outliers based on the error analyses of the linear regression. This rejection criterion typically rejected one or two points, and was found to significantly improve the estimates. With the exception of the one flow that displayed significant chemical alteration during the experiment, the palaeointensity estimates determined using the original MSP protocol yielded estimates within  $\pm 3 \mu\text{T}$  of the known field of  $49.5 \mu\text{T}$ . The domain-state corrected MSP estimates were all within  $\pm 4 \mu\text{T}$ , with no clear relationship between the uncorrected and domain-state corrected palaeointensity estimates for this data set.

**Key words:** Palaeointensity; Palaeomagnetic secular variation; Rock and mineral magnetism.

## 1 INTRODUCTION

Quantifying the history of the Earth's magnetic field as recorded by rocks enables us to understand ancient geodynamic processes and constrain geodynamo models. The absolute geomagnetic field intensity (palaeointensity) recorded by rocks is critical to this process, however, recovering this information has been problematic since the first early attempts were made (Folgerhaier 1899; Koenigsberger 1938a,b; Thellier 1941). The original methods assumed that the natural remanent magnetization (NRM) is a thermoremanent magnetization (TRM) in origin. By comparing the NRM of a rock with a laboratory induced TRM, the ancient field strength is estimated by simple scaling with the laboratory field. The main problem with this approach is that on heating and inducing the laboratory TRM, the magnetic minerals in the rocks often chemically alter, leading to incorrect palaeointensity estimates. To identify chemical alteration, Koenigsberger (1938a,b), Thellier (1941) and Thellier & Thellier (1959) developed multistep thermal heating protocols. The latter protocol was modified by Coe (1967) to include double demagnetization/remagnetization steps at increasing temperatures until a full TRM is induced. This 'Thellier-type' approach of Coe (1967) and its many subsequent modifications form the basis of most modern palaeointensity studies. In many cases it successfully identifies chemical alteration, and palaeointensity determinations can be

made from the lower temperature measurements before chemical alteration occurs. However, because of the use of the multistep heating protocol, it is required that the samples obey the laws of partial TRM (pTRM) additivity, that is, a stepwise pTRM acquired over the temperature range  $T_1$  and  $T_3$  should be equal to the sum of two pTRMs acquired over the temperature range  $T_1$ – $T_2$  and  $T_2$ – $T_3$ , respectively; pTRM independence, that is, a pTRM produced over one interval are independent of a pTRM acquired over another, and reciprocity, that is, blocking and unblocking temperatures are equal (Xu & Dunlop 2004). The laws of additivity and reciprocity are obeyed by small magnetically single domain (SD) grains, but larger multidomain (MD) grains violate the reciprocity law (Dunlop 1998) and the independence law (Yu & Dunlop 2006). The contribution of intergrain magnetostatic interactions has not been quantified rigorously, and it is still debated if interacting SD grains will obey these laws or not (Levi 1977; Shcherbakov & Sycheva 1997; Fabian 2001; Dunlop *et al.* 2005). These requirements present major problems for many rocks types, which contain a wide grain size spectrum of magnetic particles spanning the SD to MD states.

To reduce the effects of both chemical alteration and non-ideal SD behaviour, Dekkers & Böhm (2006) proposed a new method, the 'multispecimen parallel differential pTRM method' (here referred to as MSP-DB). The basic idea behind the method is simple: to overprint an ancient NRM (assumed to be

**Table 1.** Localities of the samples and thermomagnetic properties.

| Location code | Flow name       | Locality           | Date of eruption (A.D.) | Rock type | ARM thermomagnetic curve repeatability |
|---------------|-----------------|--------------------|-------------------------|-----------|----------------------------------------|
| AA            | —               | 65.0684N, 16.7668W | 1961                    | Basalt    | Repeatable                             |
| AB            | —               | 65.0699N, 16.7223W | 1961                    | Basalt    | Repeatable                             |
| AC            | Suðurbotnahraun | 65.0218N, 16.6943W | 1922/1923               | Basalt    | Partially                              |
| AD            | Kvísilahraun    | 65.0107N, 16.7032W | 1922/1923               | Basalt    | Repeatable                             |
| AF            | Mývetningahraun | 65.0289N, 16.7942W | 1922                    | Basalt    | Not repeatable                         |
| AG            | Bátshraun       | 65.0435N, 16.7228W | 1921                    | Basalt    | Partially                              |

thermoremanent in origin) with a laboratory pTRM induced at a temperature  $T$  much less than the Curie temperature ( $T_C$ ) in a laboratory field  $H_{lab}$  applied in the same direction as the NRM. It is then assumed, that if the final remanence is smaller than the original NRM,  $H_{lab} < H_{anc}$ , and if larger  $H_{lab} > H_{anc}$ . The advantage of this method over the Thellier-type methods is that the samples are only subjected to moderate heating and that the number of pTRMs induced in the samples is significantly smaller, that is, the combined effect of repeatedly breaking pTRM additivity and reciprocity rules through multiple heating is reduced.

Dekkers & Böhnel (2006) originally claimed that the method was independent of domain state, however, Michalk *et al.* (2008) provided evidence to suggest that this was incorrect. Using the phenomenological model of Fabian (2000, 2001), Fabian & Leonhardt (2010) showed that the MSP-DB method will overestimate the palaeointensity for pseudo-SD (PSD) and MD grains. To account for domain state, they introduced a modified MSP-DB protocol, which they successfully tested using synthetic samples (covering SD, PSD and MD grain sizes). In this paper, we report a study whereby we test this new modified MSP-DB protocol of Fabian & Leonhardt (2010) using historical basalts collected at the Mt Askja volcano in central Iceland.

## 2 SAMPLES

We have collected historical basaltic lavas from five 20th century flows from Mt Askja in the central highlands in Iceland (Table 1): the Bátshraun lava flow (1921), the Mývetningahraun lava flow (1922), the Suðurbotnahraun lava flow (1922 or 1923), the Kvísilahraun lava flow (1922 or 1923) and the 1961 lava flow (Hjartardóttir *et al.* 2009). Mt Askja is a stratovolcano situated in the centre of Iceland in the 200-km-long Askja fissure swarm, and last erupted in 1961 A.D. Mt Askja is now dominated by a large caldera lake, which is the result of a Plinian eruption in 1875 A.D.

## 3 METHOD

Drill cores with a diameter of 10 mm (mini-cores) were collected and orientated in the field. In the laboratory, samples were cut into specimens of 9–10 mm length, which yielded 2–5 specimens for each drill core.

### 3.1 Rock magnetic analysis

In addition to the MSP-DB analysis, we conducted routine hysteresis measurements at the Institute for Rock Magnetism (IRM), University of Minnesota, USA. The hysteresis measurements including first-order reversal curves (FORCs) were made using a

Princeton Measurements Corporation Vibrating Sample Magnetometers (VSM; Princeton Measurements Corporation, Princeton, NJ).

### 3.2 The MSP-DB method and its modifications

To conduct the MSP-DB measurements we used up to nine specimens per flow; there were insufficient specimens for flows AC and AD. For these two flows only six specimens were examined. The sample sets from the 1961 flow, that is, AA and AB (Table 1), were treated as one data set; the two localities were within 200 m of each other. Sister samples from neighbouring cores were intermixed with each other during the experiments. All the MSP-DB experiments and its modifications were made at Imperial College, London.

For the MSP-DB experiment, it is first necessary to check for the absence of secondary magnetizations in the sample, and then to select a temperature ( $T_i$ ) for the pTRM acquisition that is below the point where chemical alteration is significant. To determine this temperature, the NRM of several samples from each flow were continuously thermally demagnetised using an Orion three-axis, low-field VSM. The thermal stability of the lavas' remanences on heating up to the temperature  $T_i$  was also tested, by first demagnetizing the samples using a tumbling alternating-field (AF) Molspin demagnetizer with a peak field of 100 mT. Then, an anhysteretic remanent magnetization (ARM) was then imparted using a DTECH AF demagnetizer with a peak field of 200 mT and a bias field of 0.1 mT. The thermal demagnetization behaviour of this ARM was then measured at temperature on cycling up to  $T_i$  and back to room temperature. This was repeated and the two curves compared for repeatability.

The MSP-DB experiments were conducted using a combination of an ASC TD-48 dual-chamber thermal specimen demagnetiser and an Agico JR5A spinner magnetometer. To induce the pTRM parallel to the NRM, we used a specially designed sample holder very similar to the one used by Michalk *et al.* (2008, 2010). The error in the orientation was  $<5^\circ$ . The sample holder took only 10 mm cores. We applied successively increasing fields in 10  $\mu$ T steps from 10 to 90  $\mu$ T, using sister samples for each field. It is shown in Section 4.2 that the samples were essentially univectorial, therefore, no thermal pre-treatment was applied to the samples (Dekkers & Böhnel 2006).

We used the new protocol of Fabian & Leonhardt (2010), which includes additional steps to those proposed by Dekkers & Böhnel (2006) that allow for domain-state corrections and a chemical alteration test. The new protocol now includes five remanence measurements ( $m_0$  is the original NRM) and four addition steps, as follows.

(1)  $m_1$ . In a constant external field  $H_{lab}$  aligned parallel to original NRM, the specimen is heated to  $T_i$  and then cooled to room

temperature. When combined with  $m_0$ , this is essentially the original protocol of Dekkers & Böhnel (2006) termed here MSP-DB.

(2)  $m_2$ . In a constant external field  $H_{\text{lab}}$  aligned anti-parallel to the original NRM, the specimen is heated to  $T_i$  and then cooled to room temperature.

(3)  $m_3$ . The specimen is heated in zero field to  $T_i$ , and cooled in  $H_{\text{lab}}$  aligned parallel to the original NRM field.

(4)  $m_4$ . This is a repeat of  $m_1$ . This last step is a chemical alteration check.

Steps 2 and 3 were introduced by Fabian & Leonhardt (2010) to correct for domain-state effects. Using the pictorial representation of blocking and unblocking processes introduced by Fabian (2000), and used extensively by Fabian & Leonhardt (2010), step 2 corresponds to a correction for pTRM induced in the samples by MD material in area 1 (Fig. 1), and step 3, for the MD contribution to area 2 (Fig. 1). Using the new protocol adds two further estimates, that is, we now have three estimates for the palaeointensity depending on how many of the domain-state corrections are included. If none are included, that is, the protocol of Dekkers & Böhnel (2006), the original MSP-DB ratio  $Q_{\text{DB}}$  (nomenclature of Fabian & Leonhardt 2010) is given by

$$Q_{\text{DB}} = \frac{m_1 - m_0}{m_0}. \quad (1)$$

To determine the MSP-DB estimate, the  $Q_{\text{DB}}$  ratio is plotted versus pTRM inducing field for each sister sample, and where the fitted linear trend is equal to zero provides the field estimate. If the first domain-state correction is included, the so-called  $f$ -corrected MSP-DB ratio  $Q_{\text{FC}}$  is given by (Fabian & Leonhardt 2010)

$$Q_{\text{FC}} = 2 \frac{m_1 - m_0}{2m_0 - m_1 - m_2}. \quad (2)$$

This does not account for all the domain-state effects. The final correction is the domain-state corrected ratio  $Q_{\text{DSC}}$  given by

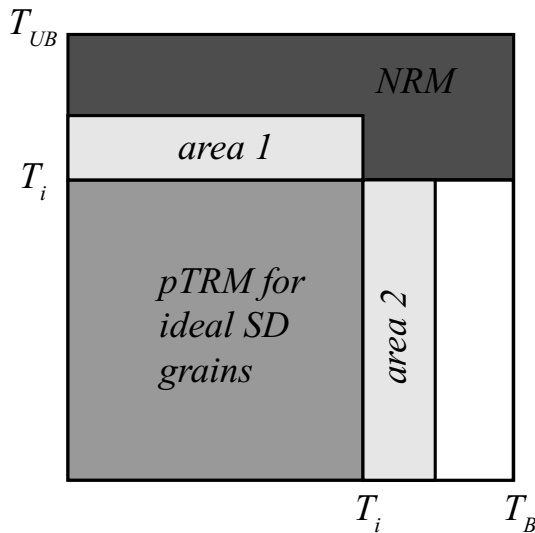

**Figure 1.** Schematic simplified blocking/unblocking spectrum diagram used to describe the remanent magnetizations for the domain-state corrected palaeointensity protocol of Fabian & Leonhardt (2010). Areas 1 and 2 correspond to the contributions MD remanence makes to the total remanence acquired on heating to  $T_i$ . For ideal SD grains the blocking and unblocking spectra are identical. Based on a drawing from Fabian & Leonhardt (2010).

(Fabian & Leonhardt 2010)

$$Q_{\text{DSC}} = 2 \frac{(1 + \alpha)m_1 - m_0 - \alpha m_3}{2m_0 - m_1 - m_2}, \quad (3)$$

where  $\alpha$  is an unknown parameter  $\geq 0$ . Fabian & Leonhardt (2010) proposed a method of determining  $\alpha$  when a sufficient number of measurements are available, the goodness of fit of the data to eq. (3) is highest for the optimal average choice of  $\alpha$ . They suggest that  $\alpha$  should be chosen by minimizing the mean quadratic deviation  $\chi^2(\alpha)$  between the available site-specific data and the linear fit.

## 4 RESULTS

### 4.1 Rock magnetic

The ratios of the magnetic hysteresis parameters, that is, the coercive force  $H_C$ , the remanent coercive force  $H_{\text{CR}}$ , the saturation magnetisation  $M_S$  and the remanent saturation magnetisation  $M_{\text{RS}}$  are shown for all the samples on a ‘Day plot’ (Day *et al.* 1977) in Fig. 2.

Generally the basaltic lava samples, notably those from the 1961 flow (AA and AB), plot towards the SD region. There are a few exceptions to this, that is, some samples from Kvislahraun (AD) and Båtshraun (AG) plot in the middle of the PSD region, and some Suðurbotnahraun (AC) and Mývetningahraun (AF) samples lie in the area above the MD region on the right-hand side of the PSD region. This latter behaviour is often attributed to thermal relaxation, that is, superparamagnetism (Jackson *et al.* 1990). Specimens from flows AC and AF show a far wider variation in their magnetic properties than specimens from the other flows.

Two example FORC diagrams are shown in Fig. 3. Generally, samples displaying SD, PSD and MD characteristics, as indicated by their position on the Day plot (Fig. 2), display corresponding FORC diagrams (e.g. Roberts *et al.* 2000; Muxworthy & Roberts 2007). For example, the sample AA6, displays an SD-like FORC diagram (Fig. 3a), and plots near the SD region on Fig. 2. Samples from AC and AG, for example, AC2A (Fig. 3b), which fall outside the usual regions on Fig. 2, consist of a peak associated with a low-coercivity magnetisation, and a higher coercive-force-tail magnetisation that is likely to be a highly stable magnetic remanence carrier. Examination of the Day plot alone (Fig. 2) belies the potential of such samples.

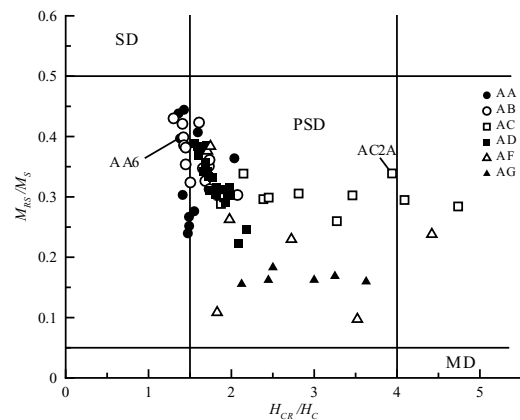

**Figure 2.** A ‘Day plot’ (Day *et al.* 1977) of the ratios of the hysteresis parameters  $M_{\text{RS}}/M_S$  versus  $H_{\text{CR}}/H_C$  for the five lava flows in this study. Two samples identified in this figure have their FORC diagrams displayed in Fig. 3. The regions commonly associated with SD, PSD and MD behaviour are labelled.

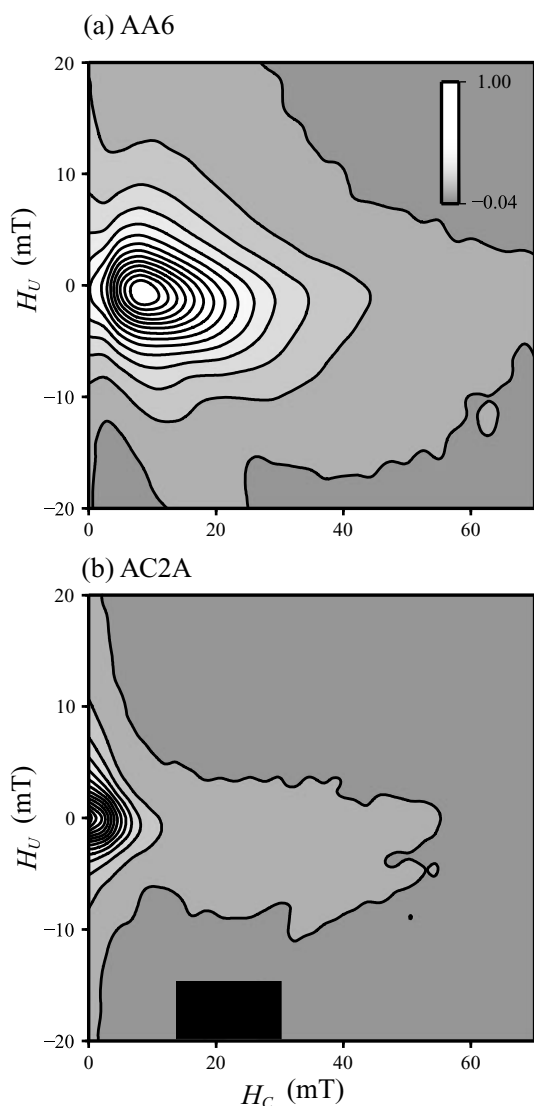

**Figure 3.** FORC diagrams for samples for sample (a) AA6 (1961 flow) and (b) AC2A (Suðurbotnahraun flow). The smoothing factor (SF) in all three diagrams is 2. The averaging time during the measurement was 100 ms. Note the identical scales for each diagram.

#### 4.2 MSP palaeointensity results

To determine the pTRM inducement temperature and verify that the NRM was univectorial, the NRM of several samples was thermally demagnetised (Figs 4 and 5). To accommodate all the samples, a pTRM inducement temperature of 350 °C was chosen. This temperature may have been a little high for flow AG (Bátshraun). In all the test samples the NRM was found to be univectorial (Fig. 5). To further verify that the NRMs were univectorial, the NRM directions for all the samples in the palaeointensity study are considered; the first measurement of the palaeointensity protocol is of the NRM. The NRM directions are plotted on an equal area projection plot (Fig. 6). It is seen that the modern day field lies within the  $\alpha_{95}$  confidence cone, that is, the lavas have recorded only the ambient field on formation. There is a degree of scatter amongst the modern data; however, it must be remembered that these specimens were sampled as 10 mm cores, which increases the directional error compared to

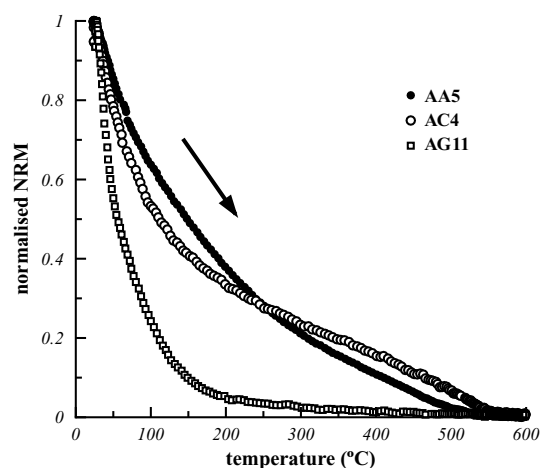

**Figure 4.** Continuous thermal demagnetisation curves of NRM in samples AA5, AC4 and AG11.

large core diameters, and we considered the NRM directions, that is, just one measurement, and not the characteristic direction.

The thermal stability of the remanence carriers in the samples was then assessed by heating to 350 °C, by examining continuous thermal demagnetisation curves of ARM. The samples displayed a range of behaviour (Fig. 7). The samples from the 1961 flows (AA and AB) and the AC (Suðurbotnahraun) flow displayed mostly repeatable ARM demagnetisation curves. The Kvíslahraun (AD) and Bátshraun (AG) flows displayed a range of behaviours, that is, some samples from these flows displayed repeatable behaviour, whereas others did not (Table 1). Generally all the samples from the Mývetningahraun (AF) flow displayed evidence for chemical alteration during repeat thermal demagnetisation of ARM (Fig. 7).

Early analysis of the palaeointensity data revealed that rather than conducting a straight scalar subtraction of intensities in eqs (1)–(3), it was necessary to include a vector subtraction of the magnetisation (Table 2). This was necessary because of step 2 (eq. 2), which induces a pTRM in the opposite direction to the original NRM, that is, in some samples at step 2 the reversed pTRM combined with the remaining NRM was not aligned with the initial NRM. The MSP-DB data was least affected by the use of scalar subtraction (Table 2). Throughout the rest of the paper we present only the data derived from vector addition/subtraction of the measured magnetizations (Table 2).

In Fig. 8, we plot the estimates for  $Q_{DB}$ ,  $Q_{FC}$  and  $Q_{DSC}$  ratios given, respectively by eqs (1)–(3), versus the pTRM inducing field for all five lava flows. Field estimates are presented in Table 2. To determine the error on each estimate, Fabian & Leonhardt (2010) propose a method based not on the quality of the linear fit, but on the measured degree of chemical alteration during the experiment, that is, by comparing the last measurement step  $m_4$  with the second measurement  $m_1$ , plus the relative size of the domain-state corrections. They propose to use these errors as weights in the linear regression. We tried this approach, however, the weighting was often found to hinge on a particular point with a low error estimate. In addition, as Fabian & Leonhardt (2010) note, in their determination the error on each individual estimate is dependent on the inducing field. Given the problems with this suggested error analysis, we employed the approach of other earlier studies (Dekkers & Böhnel 2006; Michalk *et al.* 2008), by simply determining confidence intervals at 95 per cent ( $CI_{95}$ ) to the linear fits (Table 2). We have excluded

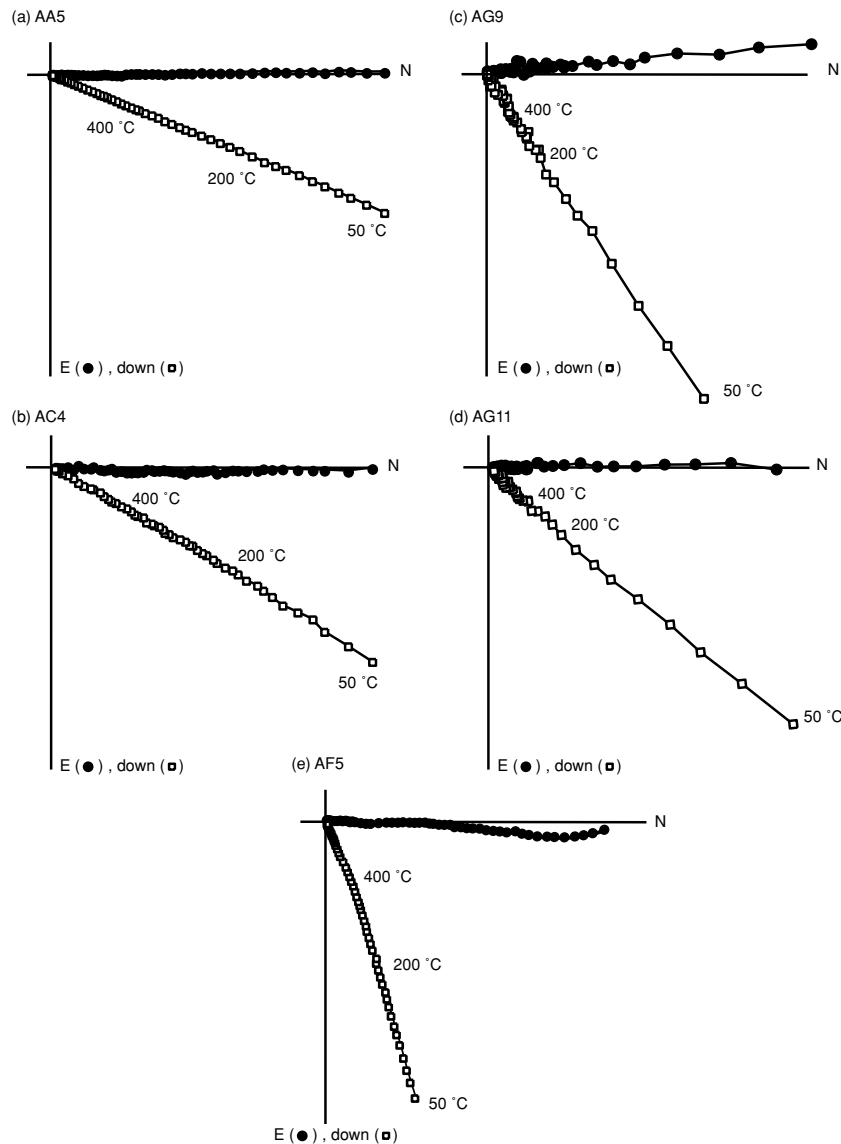

**Figure 5.** (a) Orthogonal-projection continuous thermal demagnetization plots for samples from cores: (a) AA5, (b) AC4, (c) AG9, (d) AG11 and (e) AF5. All the plots display univectorial magnetizations.

these confidence intervals from the plots for clarity. At 95 per cent confidence some confidence intervals were not defined (ND; Table 2), that is, the confidence limit does not cross the  $x$ -axis or is negative meaning that there is essentially no relationship at this confidence level.

#### 4.2.1 Original MSP-DB determination

We have plotted the original MSP-DB calculation of Dekkers & Böhnel (2006), that is,  $Q_{DB}$  from eq. (1) in the left-hand column of Fig. 8. The palaeointensity estimates are tabulated in Table 2. The 1961 flow (AA and AB), returns an estimate of 51  $\mu\text{T}$  but with a large  $CI_{95}$  level of 18–87  $\mu\text{T}$  because of large levels of dispersion in the data. The expected value is 49.5  $\mu\text{T}$ . Flow AC (Suðurbotnshraun) returns a value above the expected intensity at 64  $\mu\text{T}$ , but  $CI_{95}$  is not defined and the estimate is rejected (Table 2). Samples from flow AD (Kvíslahraun) yield an overestimate (66  $\mu\text{T}$ ,  $CI_{95}$  is 38–126  $\mu\text{T}$ ), and flow AG (Bátshraun) a value of 53  $\mu\text{T}$ , but with a wide confidence interval ( $CI_{95}$  is 28–93  $\mu\text{T}$ ). Samples from

AF (Mývetningahraun) yield a negative intensity estimate, and  $CI_{95}$  is undefined (Table 2) and the estimate is rejected.

#### 4.2.2 MSP-FC and MSP-DSC determinations

In Fig. 8 we consider the proposed domain-state correction ratios  $Q_{FC}$  and  $Q_{DSC}$  suggested by Fabian & Leonhardt (2010). The full MSP-DSC correction is dependent on a parameter  $\alpha$  (eq. 3), which is found by minimizing  $\chi^2$  ( $\alpha$ ). For all our flows we found that  $\chi^2$  ( $\alpha$ ) was minimized at  $\alpha = 0$ . Fabian & Leonhardt (2010) suggest a default value of  $\alpha = 0.5$ . As  $Q_{FC}$  and  $Q_{DSC}$  are identical for  $\alpha = 0$ , we present the MSP-DSC terms for  $\alpha = 0.5$ , although it should be realized that for our data this is incorrect.

The MSP-FC and MSP-DSC estimates derived from the  $Q_{FC}$  and  $Q_{DSC}$  ratios, respectively, are rejected for the 1961, AC and AF flows, as their confidence limits were undefined (Table 2). Flow AD (Kvíslahraun) yielded an MSP-FC estimate of 66  $\mu\text{T}$  ( $CI_{95}$  42–123  $\mu\text{T}$ ), but the MSP-DSC estimate was rejected as  $CI_{95}$  is not defined. Flow AG (Bátshraun) returned an MSP-FC estimate of

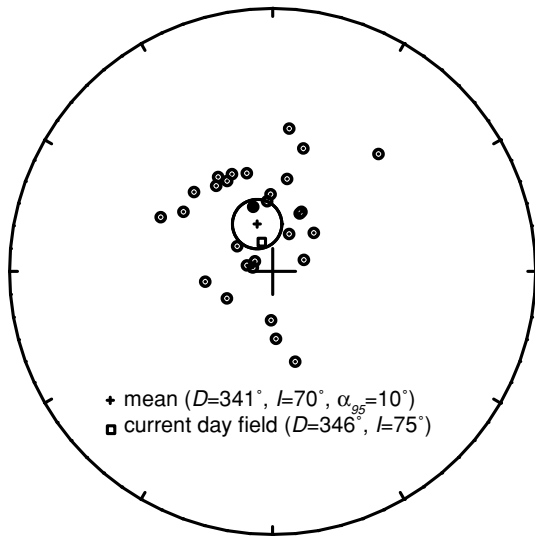

**Figure 6.** An equal area projection plot displaying the NRM directions for the samples used in the palaeointensity study. For cores where more than one sample was used, the core average direction was taken in the calculation of the mean declination ( $D$ ), inclination ( $I$ ) and  $\alpha_{95}$ . The NRM data displays quite a high level of scatter, although it must be remembered that these cores were only 10 mm cores, which increases orientation error. The modern day field direction ( $D = 346^\circ$  and  $I = 75^\circ$ ) was determined using IGRF11. For comparison, the field in 1921 was  $D = 331^\circ$  and  $I = 76^\circ$ .

53  $\mu\text{T}$  ( $CI_{95}$  29–81  $\mu\text{T}$ ), and an MSP-DSC estimate of 46  $\mu\text{T}$  ( $CI_{95}$  8–73  $\mu\text{T}$ ).

## 5 DISCUSSION

With the exception of flow AF (Mývetningahraun), the palaeointensity estimates all lay close to the expected field intensity of 49.5  $\mu\text{T}$  (Table 2), however, all have very large confidence ranges. The net average effect of applying the MSP-FC and MSP-DSC protocols of Fabian & Leonhardt (2010) is to decrease the intensity estimate compared to the MSP-DB method of Dekkers & Böhnel (2006) (Table 2).

Unlike previous studies, we applied vector addition/subtraction in all our determinations. Given that the samples had essentially univectorial NRM direction (Fig. 5) and that some of the samples were found to be chemically unstable to relatively modest heating, it is suggested that the vector addition/subtraction was required because of the acquisition of chemical remanent magnetizations (CRMs). CRMs acquired in reverse field directions to the original NRM are likely to lead to more complex total remanences, than CRMs induced in the same direction as the original NRM. The use of the  $m_2$  step has the potential to act as another alteration check.

### 5.1 A new selection criterion

It is clear by examination of Fig. 8 that the final fits are often strongly influenced by individual ‘outliers’; the data generally display higher levels of dispersion than observed in most previous studies of this type (Michalk *et al.* 2008; Böhnel *et al.* 2009; Michalk *et al.* 2010). We propose a new selection/rejection approach, based on the observation that the outliers are generally associated with large differences between  $m_1$  and  $m_4$ , that is, large changes in the magnetic mineralogies’ recording capacity during the experiment. To apply

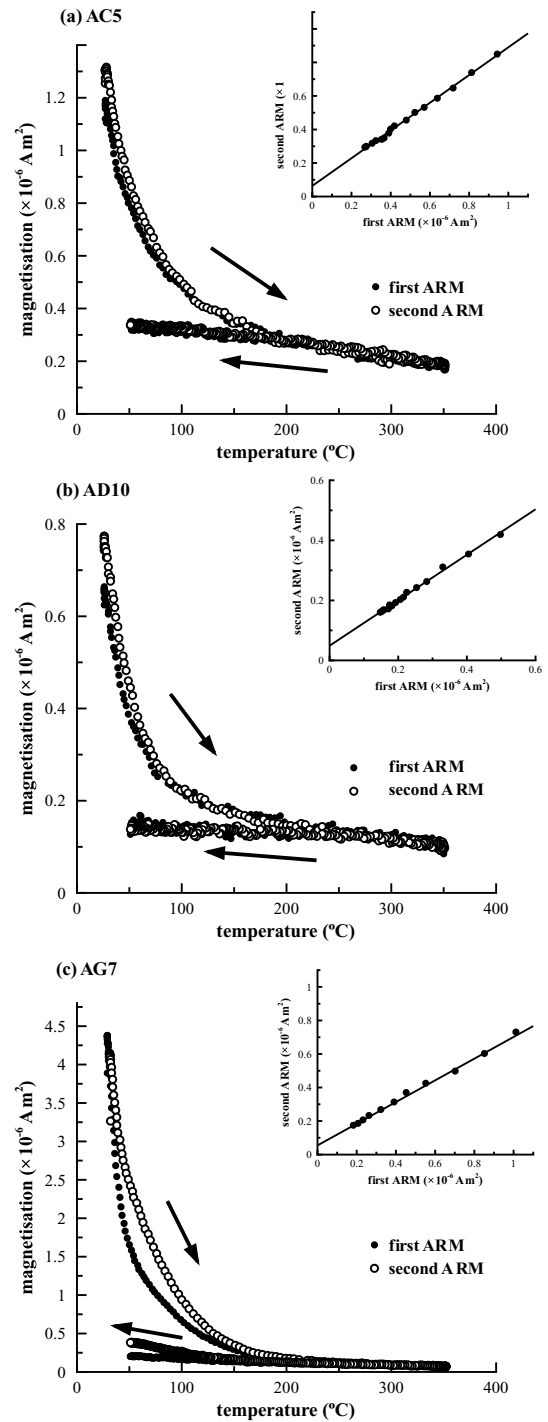

**Figure 7.** Continuous thermal demagnetisation curves for ARM induced twice, that is, first and second, in samples: (a) AC5, (b) AD10 and (c) AG11. Each plot contains an inset where the binned data for the first and second ARM curves are plotted against each other. A linear trend is fitted in the inset.

this new criterion, we first sort the data within each flow by  $\varepsilon_{\text{alt}}^*$ , where  $\varepsilon_{\text{alt}}^*$  is similar to the  $\varepsilon_{\text{alt}}$  [ $=|(m_1 - m_4)/m_1|$ ] parameter given by Fabian & Leonhardt (2010).  $\varepsilon_{\text{alt}}^*$  is defined as

$$\varepsilon_{\text{alt}}^* = 1 - \left| \frac{m_1 - m_4}{m_1} \right|. \quad (4)$$

**Table 2.** Palaeointensity estimates for the basaltic lavas.

| Location code | Geomagnetic field <sup>a</sup> (μT) | $\varepsilon_{\text{alt}}$ range |                               | MSP-DB        |                       | MSP-FC        |                       | MSP-DSC ( $\alpha = 0.5$ ) |                       |
|---------------|-------------------------------------|----------------------------------|-------------------------------|---------------|-----------------------|---------------|-----------------------|----------------------------|-----------------------|
|               |                                     |                                  |                               | Estimate (μT) | CI <sub>95</sub> (μT) | Estimate (μT) | CI <sub>95</sub> (μT) | Estimate (μT)              | CI <sub>95</sub> (μT) |
| AA and AB     | 49.5                                | 0.04–0.36                        | Scalar                        | 46            | 19 – 67               | 14            | ND–ND                 | 25                         | ND–ND                 |
|               |                                     |                                  | Vector                        | 51            | 18 – 87               | 47            | ND–59                 | 41                         | ND–74                 |
|               |                                     |                                  | $E_i$ , reject 2 <sup>b</sup> | 49            | 35 – 75               | 45            | 13 – 71               | 41                         | ND–65                 |
| AC            | 49.5                                | 0.03–0.90                        | Scalar                        | 55            | ND–ND                 | ND            | ND–ND                 | ND                         | ND–ND                 |
|               |                                     |                                  | Vector                        | 64            | ND–ND                 | 74            | ND–ND                 | 68                         | ND–ND                 |
|               |                                     |                                  | $E_i$ , reject 1              | 49            | 35 – 62               | 50            | 36 – 62               | 45                         | 30 – 56               |
| AD            | 49.5                                | 0.01–0.30                        | Scalar                        | 52            | 43–ND                 | 27            | ND–ND                 | 29                         | ND–ND                 |
|               |                                     |                                  | Vector                        | 67            | 40 – 126              | 66            | 42 – 123              | 49                         | ND–ND                 |
|               |                                     |                                  | $E_i$ , reject 2              | 52            | 40 – 77               | 54            | 38 – 91               | 40                         | ND–ND                 |
| AF            | 49.5                                | 0.01–0.60                        | Scalar                        | ND            | ND–ND                 | 87            | ND–ND                 | 99                         | ND–ND                 |
|               |                                     |                                  | Vector                        | ND            | ND–ND                 | 58            | ND–ND                 | 52                         | ND–44                 |
|               |                                     |                                  | $E_i$ , reject 3              | 35            | ND–59                 | 33            | ND–ND                 | 28                         | ND – ND               |
| AG            | 49.5                                | 0.01–0.26                        | Scalar                        | 46            | 23 – 64               | 47            | 29 – 147              | 43                         | 40 – 164              |
|               |                                     |                                  | Vector                        | 53            | 27 – 93               | 53            | 29 – 80               | 46                         | 8 – 73                |
|               |                                     |                                  | $E_i$ , reject 0              | 53            | 27 – 93               | 53            | 29 – 80               | 46                         | 8 – 73                |

Note: ND, not defined (this includes negative numbers).

<sup>a</sup>Deduced from the International Geomagnetic Reference Field (IGRF).

<sup>b</sup>Number of rejected points during  $E_i$  minimization, determined using vector calculations.

The range of  $\varepsilon_{\text{alt}}^*$  values for each flow are tabulated in Table 2. Second, we stepwise reject the data with the largest  $\varepsilon_{\text{alt}}^*$  values, determining the error estimate ( $E_i$ ) of each linear regression ( $y = a_i x + b_i$ ), where  $E_i$  is given by

$$E_i = \left[ \left( \frac{\Delta a_i}{a_i} \right)^2 + \left( \frac{\Delta b_i}{b_i} \right)^2 \right]^{\frac{1}{2}}, \quad (5)$$

and  $a_i$  and  $\Delta a_i$  are the gradient and its associated error,  $b_i$  the fitted constant and  $\Delta b_i$  its error and  $i$  the number of samples used to make the determination. We then take the minimum value of  $E_i$  as the most robust palaeointensity estimate.  $E_i$  is reduced by removing outliers and by increasing the number of points used in the linear fit, therefore  $E_i$  is minimized by removing only a few samples with large  $\varepsilon_{\text{alt}}^*$  values, that is, typically outliers.

We applied this approach to our data set, and the ‘ $E_i$  minimized’ palaeointensity estimates are tabulated in Table 2. Fig. 9 depicts a plot of  $E_i$  versus  $i$  for three flows, and in Fig. 8 the rejected data points are highlighted. It is readily seen that the removal of outliers both improves the quality of the palaeointensity estimate and significantly reduces the confidence interval ranges compared to the palaeointensity estimates made for all the samples. For example, for flow AD (Kvísilahraun) two points are removed, reducing the MSP-DB estimate from 65 to 52 μT and the 95 per cent confidence range from 38–126 μT to 40–77 μT. For flow AC (Suðurbotnahnraun), the removal of just one point reduces the MSP-DB and MSP-FC estimates to 49 and 50 μT, respectively, but also allows for the definition of confidence limits that are relatively narrow, that is, 35–62 μT and 36–62 μT, respectively (Table 2). The most unreliable flow AF (Mývetningahnraun), now produces more realistic palaeointensity estimates, for example, the MSP-DB estimate is 35 μT rather than being negative, however, we still reject all the estimates for this flow as the confidence limits cannot be defined (Table 2). For flow AG (Bátshraun), which had no obvious outliers,  $E_i$  was minimized when all the data points were included, that is, the proposed selection criteria palaeointensity estimate and the original estimate are identical.

## 5.2 How well do the domain-state corrections work?

Given the significant improvement to the palaeointensity estimates after the new selection criteria introduced in Section 5.1, we consider only the  $E_i$  minimized MSP-DB, MSP-FC and MSP-DSC estimates (Table 2). As stated earlier for our data set, we found that  $\chi^2$  ( $\alpha$ ) is minimised for  $\alpha = 0.0$  for which MSP-FC  $\equiv$  MSP-DSC; in our estimations in Table 2, we have used  $\alpha = 0.5$ , albeit incorrectly, as suggested as the default value by Fabian & Leonhardt (2010). It is clear from Table 2 that for our data set, MSP-FC provides better estimates than MSP-DSC ( $\alpha = 0.5$ ), that is, in four out of five case MSP-FC produces an estimate that is closer to the expected value than the MSP-DSC ( $\alpha = 0.5$ ) estimate (Table 2). In the other case, that is, for the AG flow (Bátshraun), the MSP-FC estimate is 3.5 μT over the actual field, the MSP-DSC ( $\alpha = 0.5$ ) estimate 3.5 μT under. This demonstrates the importance of determining  $\alpha$  for individual data sets.

The MSP-DB and the MSP-FC [ $\equiv$  MSP-DSC ( $\alpha = 0.0$ )] estimates are generally similar, although there is no consistent trend. For example, for flow AC the MSP-DB estimate is 49 μT and the MSP-FC estimate is 50 μT with similar confidence ranges (Table 2), and for the 1961 flow, the MSP-DB estimate is 48 μT and the MSP-FC estimate is 45 μT with similar confidence ranges (Table 2). The flow with the most MD-like characteristics, that is, AG, displayed the largest difference between the MSP-DB and MSP-FC estimates, although the latter estimate was only marginally better (Table 2). Therefore, from this data set it is not clear whether the application of the domain-state corrections improves the palaeointensity, however, given the limitations of this data set, that is, five lava flows from the same volcano, it is probably worth pursuing the protocol of Fabian & Leonhardt (2010) in future studies. The data supports the first-order symmetry model of Biggin & Podrais (2006).

## 6 CONCLUSIONS

We have determined palaeointensity estimates from a suite of historical lavas from Mt Askja, with the purpose of testing the domain-state corrections proposed by Fabian & Leonhardt (2010) to the original MSP-DB method of Dekkers & Böhnelt (2006). We have

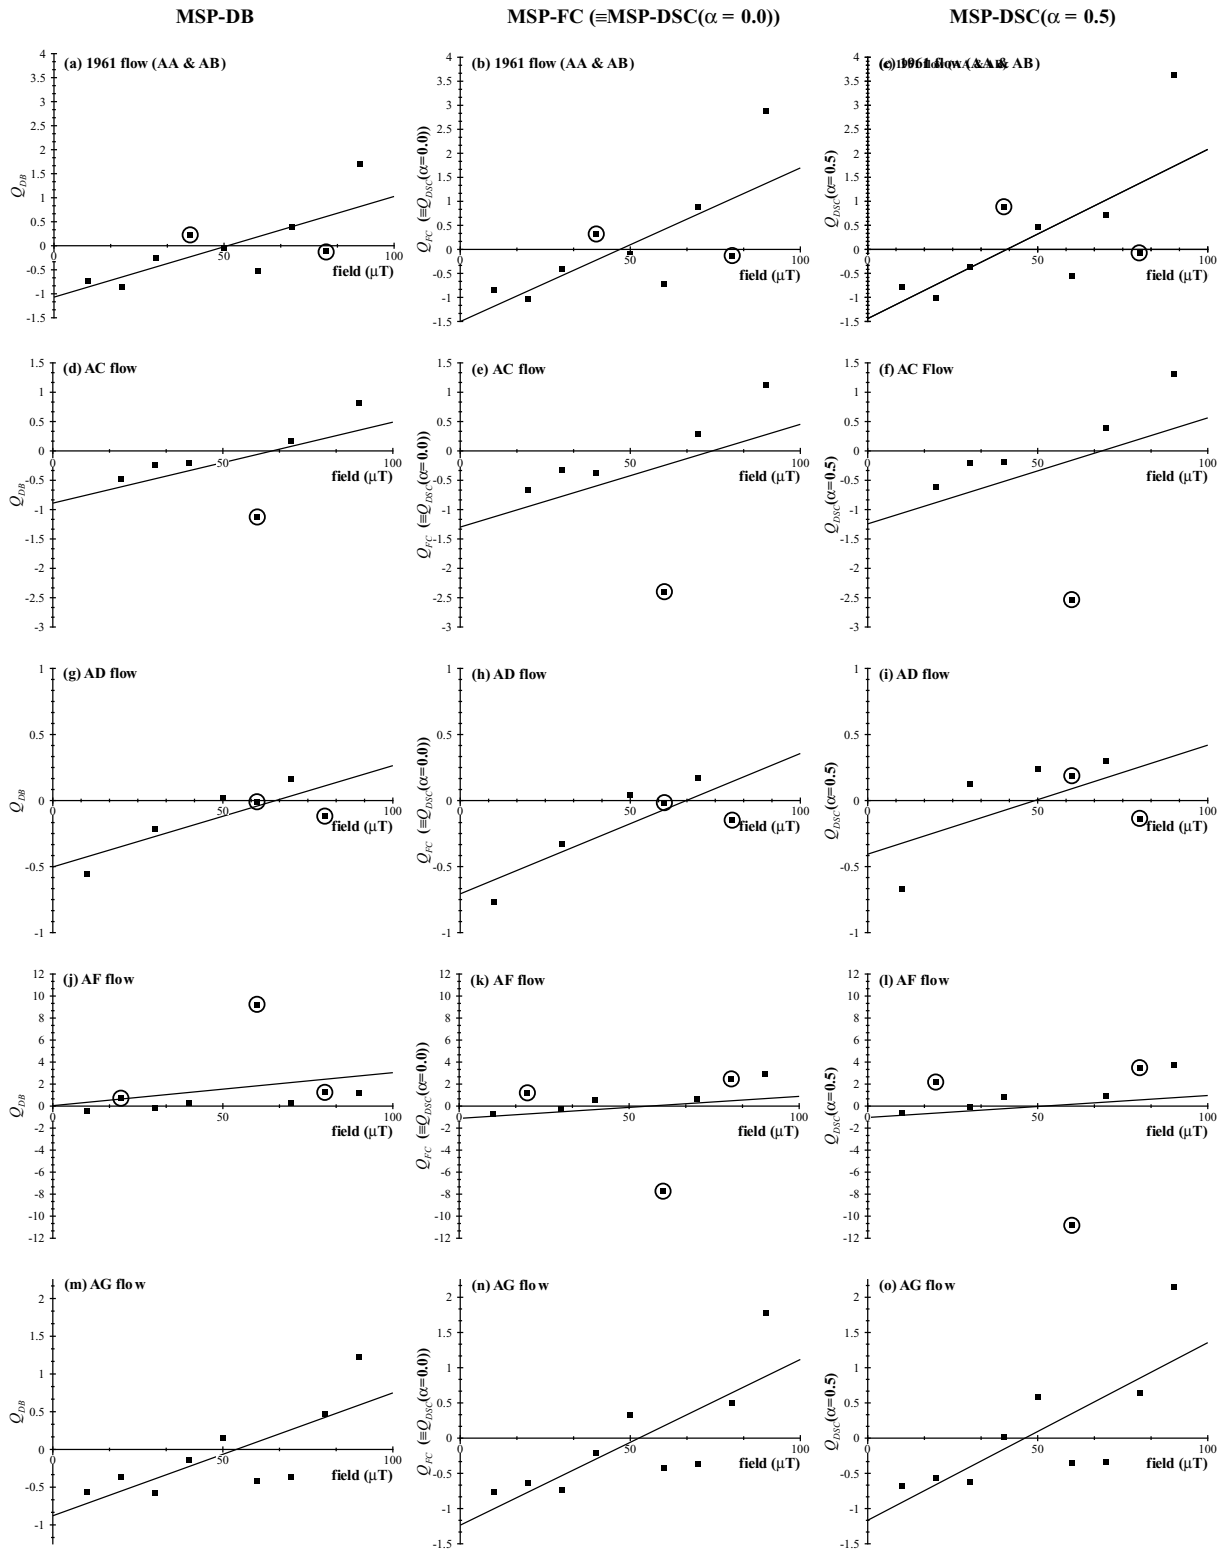

**Figure 8.** Palaeointensity estimates for the five flows in this study. In the left-hand column are plotted the  $Q_{DB}$  ratios versus field from which the MSP-DB estimates are calculated, similarly for the middle column the  $Q_{FC}$  ratios, and in the right hand column the  $Q_{DSC}$  ratios. In this paper the optimal value of  $\alpha$  (eq. 3) was found to be zero, therefore, for this paper MSP-FC = MSP-DSC, as MSP-FC  $\equiv$  MSP-DSC ( $\alpha = 0.0$ ). In the right-hand column  $\alpha$  was set to 0.5, as this was the default value suggested by Fabian & Leonhardt (2010). The rejection criterion introduced in Section 5.1 has not been applied, although the rejected points are ringed. Note the difference in scales on the y-axis.



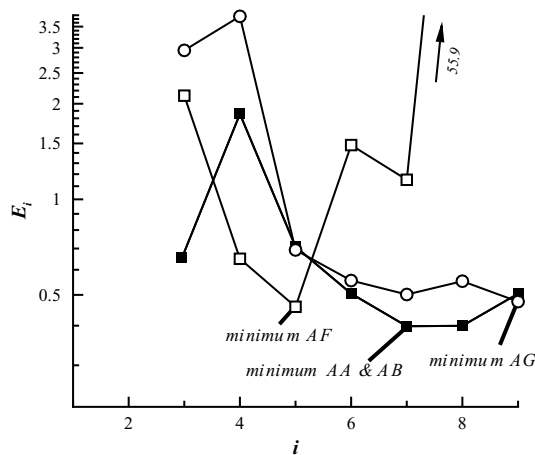

**Figure 9.**  $E_i$  versus  $i$ , for three of the lava flows (AA and AB, AF and AG).  $E_i$  is defined in eq. (5), and  $i$  is the number of samples used to make the determination. The minimum value of  $E_i$  is used to reject possible outliers associated with large errors as discussed in Section 5.1. For flow AG no points are rejected, for AA and AB (1961) flow two points are rejected and three for the AF flow (AF initially only had eight samples). For a linear trend, the error on the linear fit for  $i \leq 2$  is meaningless and the plot is truncated.

introduced two alterations to the proposed method of Fabian & Leonhardt (2010): (1) we use vector addition/subtraction in our calculations (Table 2) and (2) we have introduced and applied a new criterion that attempts to improve the robustness of the estimates by preferentially removing outliers based on the error analyses of the linear fits. The second addition was the more significant (Table 2), and was introduced to remove ‘outliers’, which were common to our samples. Outlying behaviour was generally observed in samples that displayed high levels of chemical alteration during the experiment, that is, the wide dispersion in the samples’ response was likely because of chemical alteration of the magnetic minerals within the samples.

With the exception of one flow (AF), which displayed significant alteration during the experiment, the palaeointensity estimates determined using the MSP-DB protocol determined using the  $E_i$  minimization procedure were all within  $\pm 3 \mu\text{T}$  of the expected estimate, and the MSP-FC  $\equiv$  MSP-DSC ( $\alpha = 0.0$ ) all lie within  $\pm 4 \mu\text{T}$  of the actual value of  $49.5 \mu\text{T}$ . Generally, there was no significant difference between the MSP-DB and the domain-state corrected estimates, although the one flow, that is, AG (Bátshraun), which had the most MD-like hysteresis parameters displayed a slight improvement on the application of the domain-state corrections (Table 2).

One problem that still remains is how to assess the degree of chemical alteration in the samples on heating. In this study, we tried to assess this using thermal demagnetization of ARM, however, it is clear from these experiments that there is significant variation between sister samples, making such experiments non-definitive. We support the final measurement step, that is,  $m_4$ , suggested by Fabian & Leonhardt (2010), as this repeat step provides a measurement of chemical alteration during the experiment through eq. (4). However, the most likely heating step where chemical alteration occurs is on the initial heating step, that is, between  $m_0$  and  $m_1$ . It is difficult to assess the degree of alteration over this step; room temperature susceptibility can be measured before and after heating, but again this does not provide a definitive answer.

In conclusion, with the exception of the flow AF (Mývetningahraun), which displayed significant alteration and

erratic behaviour during the experiment, both the original MSP-DB and the domain-state corrected estimates provide estimates comparable with those published on other historical lavas (Dekkers & Böhnell 2006; Michalk *et al.* 2008). The new criterion proposed in this paper that preferentially removes outliers improves the quality of the palaeointensity estimates.

## ACKNOWLEDGMENTS

This work was funded by the Royal Society. We would like to thank Margaret Hartley and Karin Strohecker for field assistance in Iceland. Some measurements were made at the Institute for Rock Magnetism, University of Minnesota, which is funded by the National Science Foundation, W. M. Keck Foundation and the University of Minnesota.

## REFERENCES

- Biggin, A.J. & Poidras, T., 2006. First-order symmetry of weak-field partial thermoremanence in multi-domain ferromagnetic grains. 1. Experimental evidence and physical implications, *Earth planet. Sci. Lett.*, **245**, 438–453.
- Böhnell, H., Dekkers, M. & Delgado-Argote, L., 2009. Comparison between the microwave and multispecimen parallel difference pTRM palaeointensity methods, *Geophys. J. Int.*, **177**, 383–394.
- Coe, R.S., 1967. The determination of paleointensities of the Earth’s magnetic field with emphasis on mechanisms which could cause non-ideal behavior in Thellier’s method, *J. Geomag. Geoelectr.*, **19**, 157–179.
- Day, R., Fuller, M.D. & Schmidt, V.A., 1977. Hysteresis properties of titanomagnetites: grain-size and compositional dependence, *Phys. Earth planet. Inter.*, **13**, 260–267.
- Dekkers, M.J. & Böhnell, H.N., 2006. Reliable absolute palaeointensities independent of magnetic domain state, *Earth planet. Sci. Lett.*, **248**, 508–517.
- Dunlop, D.J., 1998. Thermoremanent magnetization of nonuniformly magnetized grains, *J. geophys. Res.*, **103**, 30 561–30 574.
- Dunlop, D.J., Zhang, B.X. & Ozdemir, O., 2005. Linear and nonlinear Thellier paleointensity behavior of natural minerals, *J. geophys. Res.*, **110**, B01103, doi:10.1029/2004JB003095.
- Fabian, K., 2000. Acquisition of thermoremanent magnetization in weak magnetic fields, *Geophys. J. Int.*, **142**, 478–486.
- Fabian, K., 2001. A theoretical treatment of paleointensity determination experiments on rocks containing pseudo-single or multi domain magnetic particles, *Earth planet. Sci. Lett.*, **188**, 45–58.
- Fabian, K. & Leonhardt, R., 2010. Multiple-specimen absolute paleointensity determination: an optimal protocol including pTRM normalization, domain-state correction, and alteration test, *Earth planet. Sci. Lett.*, **297**, 84–94.
- Folgerhaiter, G., 1899. Sur les variations séculaires de l’inclinaison magnétique dans l’antiquité, *J. Phys.*, **8**, 660–667.
- Hjartardóttir, Á., Einarsson, P. & Sigurdsson, H., 2009. The fissure swarm of the Askja volcanic system along the divergent plate boundary of N Iceland, *Bull. Volcano.*, **71**, 961–975.
- Jackson, M.J., Worm, H.-U. & Banerjee, S.K., 1990. Fourier analysis of digital hysteresis data: rock magnetic applications, *Phys. Earth planet. Inter.*, **65**, 78–87.
- Koenigsberger, J.G., 1938a. Natural residual magnetism of eruptive rocks—part 1, *Terr. Magn. Atoms. Elec.*, **43**, 119–130.
- Koenigsberger, J.G., 1938b. Natural residual magnetism of eruptive rocks—part 2, *Terr. Magn. Atoms. Elec.*, **43**, 299–320.
- Levi, S., 1977. The effect of magnetite particle size on paleointensity determinations of the geomagnetic field, *Phys. Earth planet. Inter.*, **13**, 245–259.
- Michalk, D., Biggin, A. & Knudsen, M., 2010. Application of the multispecimen palaeointensity method to Pleistocene lava flows from the Trans-Mexican Volcanic Belt, *Phys. Earth planet. Inter.*, **179**, 139–156.
- Michalk, D., Muxworthy, A.R., Böhnell, H., MacLennan, J. & Nowaczyk, N.R., 2008. Evaluation of the multispecimen parallel differential pTRM

- method: a test on historical lavas from Iceland and Mexico, *Geophys. J. Int.*, **173**, 409–420.
- Muxworthy, A.R. & Roberts, A.P., 2007. First-order reversal curve (FORC) diagrams, in *Encyclopedia of Geomagnetism and Paleomagnetism*, pp. 266–272, eds Herrero-Bervera, E. & Gubbins, D., Springer, Dordrecht.
- Roberts, A.P., Pike, C.R. & Verosub, K.L., 2000. First-order reversal curve diagrams: a new tool for characterizing the magnetic properties of natural samples, *J. geophys. Res.*, **105**, 28 461–28 475.
- Shcherbakov, V.P. & Sycheva, N.K., 1997. Fulfillment of the Thellier's laws of independence and additivity of partial thermoremanent magnetization for interacting single domain grains, *Izv. Akad. Nauk SSSR Fiz. Zemli*, **4**, 83–88.
- Thellier, E., 1941. Sur la vérification d'une méthode permettant de déterminer l'intensité du champ magnétique terrestre dans la Passé, *Comp. Rend. Heb. Séan. Acad. Sci.*, **212**, 281–283.
- Thellier, E. & Thellier, O., 1959. Sur l'intensité du champ magnétique terrestre dans le passé historique et géologique, *Ann. Géophys.*, **15**, 285–376.
- Xu, S. & Dunlop, D.J., 2004. Thellier paleointensity theory and experiments for multidomain grains, *J. geophys. Res.*, **109**, B07103, doi:10.1029/2004JB003024.
- Yu, Y.J. & Dunlop, D.J., 2006. Testing the independence of partial thermoremanent magnetizations of single-domain and multidomain grains: implications for paleointensity determination, *J. geophys. Res.*, **111**, doi:10.1029/2006JB004434.
